# Supplementary material for: Effect of Protein Content on Heat Stability of Reconstituted Milk Protein Concentrate under Controlled Shearing
Source: MDPI journal article supplement (doi:10.3390/foods13020263), 2024-01-14

## Supplementary Material

### Effect of Protein Content on Heat Stability of Reconstituted Milk Protein Concentrate under Controlled Shearing

Anushka Mediwaththe, Thom Huppertz, Jayani Chandrapala, Todor Vasiljevic

#### Content

**Figure S1.** Score plots of principal component analysis of FTIR spectra obtained within the Amide I region from 4% RMPC dispersions sheared at  $100\text{ s}^{-1}$ ,  $1000\text{ s}^{-1}$  or  $1500\text{ s}^{-1}$  during heating at  $90\text{ }^{\circ}\text{C}$  for 5min. (A) or  $121^{\circ}\text{C}$  for 2.6 min (B) and 8% MPC suspensions sheared at  $100\text{ s}^{-1}$ ,  $1000\text{ s}^{-1}$  or  $1500\text{ s}^{-1}$  during heating at  $90\text{ }^{\circ}\text{C}$  for 5min. (C) or  $121^{\circ}\text{C}$  for 2.6 min (D).

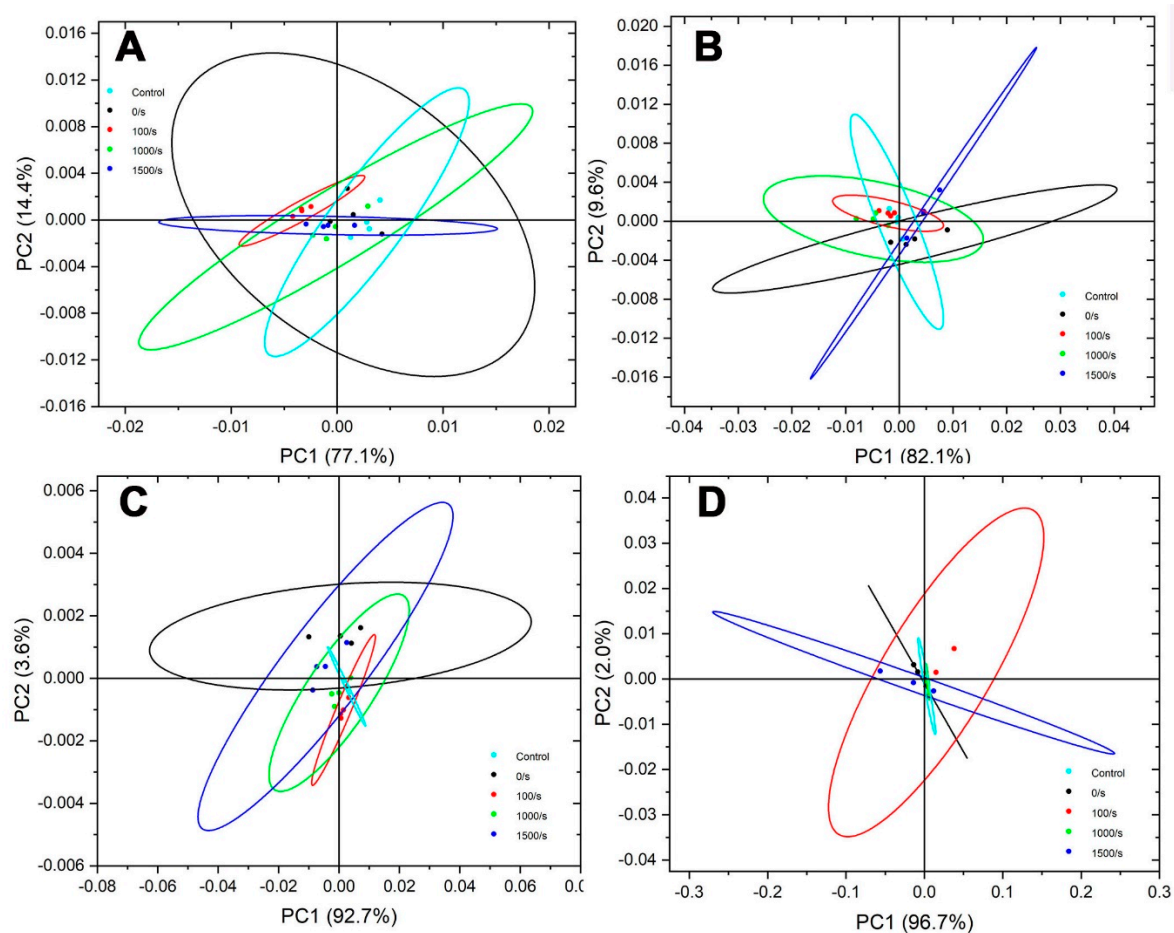

Supplement: s1 [file s1]
